# Supplementary material
Source: Springer Nature journal article supplement (https://www.springermedizin.de/resource/supplementary/12885_2007_940_MOESM1_ESM.pdf/9471200)
Supplement: MOESM1 [file 9471200]

## Additional File 1 - Table showing tumour model IFP ranges, and mean and median values.

|                  | Sub-cutaneously                                              | Intra-muscularly                                                                            | Cervix                                                                                     | Spontaneous MG                                                                           | Transplanted MG                                                                          |
|------------------|--------------------------------------------------------------|---------------------------------------------------------------------------------------------|--------------------------------------------------------------------------------------------|------------------------------------------------------------------------------------------|------------------------------------------------------------------------------------------|
| <b>KHT-C</b>     | Range: 1-14 mmHg<br>Mean: 6 mmHg<br>Median: 6 mmHg<br>(n=12) | <b>Range: 2-42 mmHg</b><br><b>Mean: 16 mmHg</b><br><b>Median: 14 mmHg</b><br><b>(n=104)</b> |                                                                                            |                                                                                          |                                                                                          |
| <b>Me180</b>     |                                                              | Range: 5-68 mmHg<br>Mean: 33 mmHg<br>Median: 30 mmHg<br>(n=26)                              | <b>Range: 4-21 mmHg</b><br><b>Mean: 9 mmHg</b><br><b>Median: 8 mmHg</b><br><b>(n=28)</b>   |                                                                                          |                                                                                          |
| <b>SiHa</b>      |                                                              | Range: 20-56 mmHg<br>Mean: 32 mmHg<br>Median: 28 mmHg<br>(n=9)                              | <b>Range: 2-26 mmHg</b><br><b>Mean: 14 mmHg</b><br><b>Median: 15 mmHg</b><br><b>(n=10)</b> |                                                                                          |                                                                                          |
| <b>MMTV-PyMT</b> |                                                              | Range: 13-45 mmHg<br>Mean: 26 mmHg<br>Median: 25 mmHg<br>(n=15)                             |                                                                                            | <b>Range: 2-20 mmHg</b><br><b>Mean: 8 mmHg</b><br><b>Median: 7 mmHg</b><br><b>(n=27)</b> | <b>Range: 2-22 mmHg</b><br><b>Mean: 9 mmHg</b><br><b>Median: 8 mmHg</b><br><b>(n=62)</b> |
